# Supplementary material for: Glucose variability in 6–12-month-old healthy infants
Source: Frontiers journal article supplement (doi:10.3389/fnut.2023.1128389), 2023-07-12

## Changes in glucose response to feeding in 6–12-month-old healthy infants

### Participant Flow Diagram

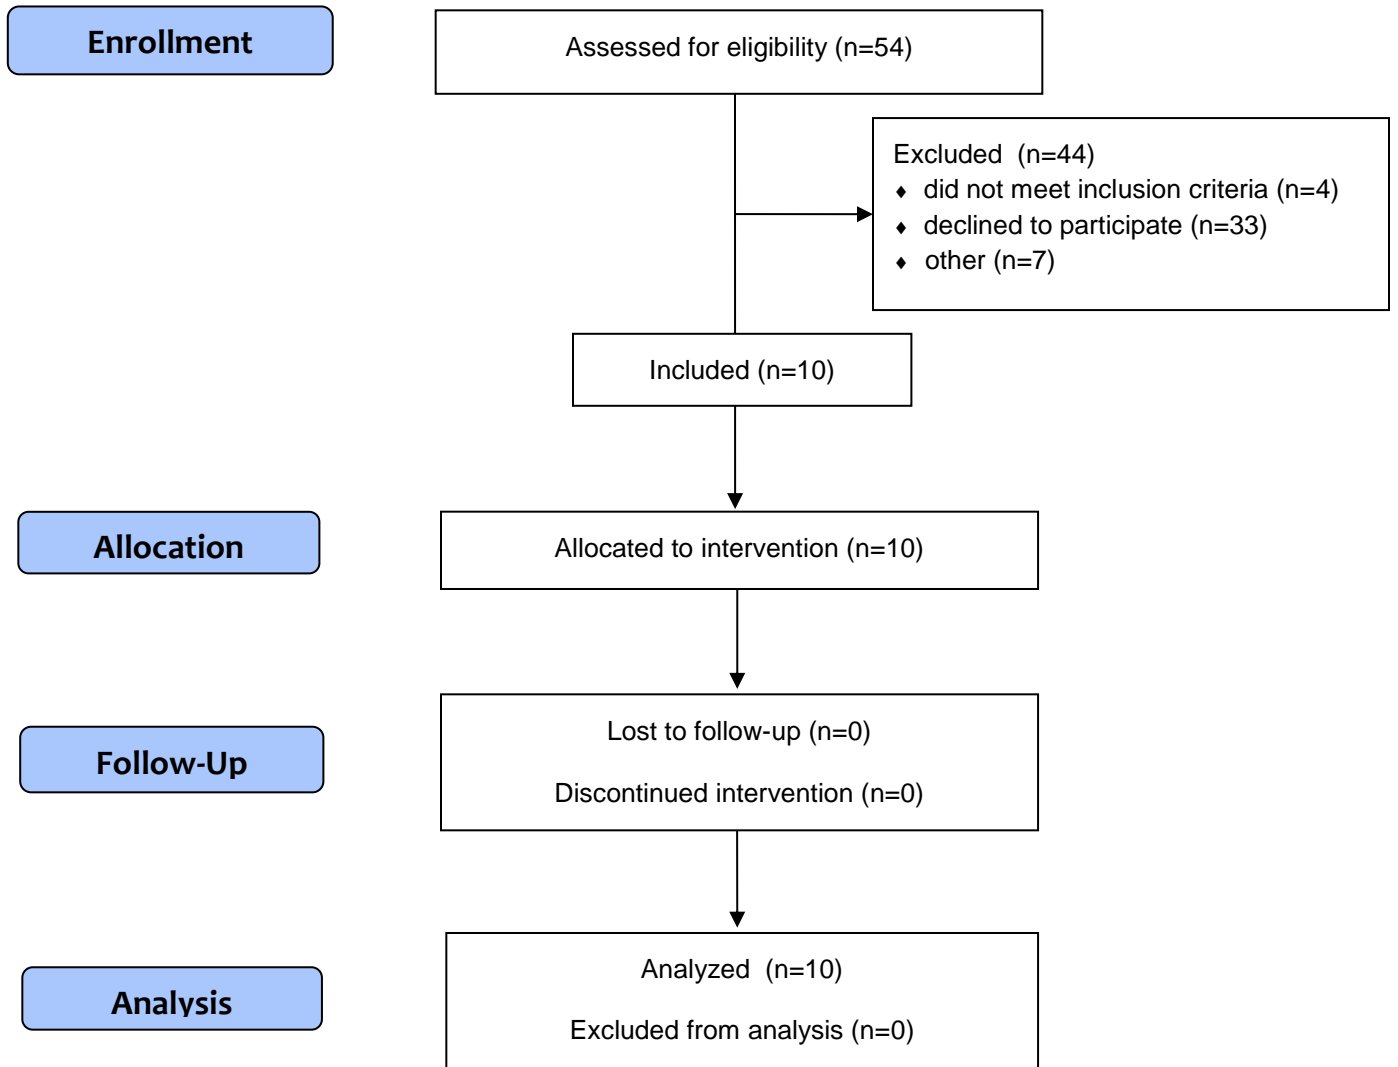

Supplement: Data_Sheet_1.PDF [file Data_Sheet_1.PDF]
